# Supplementary material
Source: PubMed Central journal article supplement (PMC2889604)
Supplement: supp_dev.047605_DEV047605TableS1.pdf [file supp_dev.047605_DEV047605TableS1.pdf]

**Table S1. Microarray data on MRTF cortical bdKO samples at P0**

| Fold change | Gene symbol     | Gene title                                         |
|-------------|-----------------|----------------------------------------------------|
| -7.6        | <i>Antxr2</i>   | anthrax toxin receptor 2                           |
| -6.9        | <i>Mett5d1</i>  | methyltransferase 5 domain containing 1            |
| -6.8        | <i>Pctk1</i>    | PCTAIRE-motif protein kinase 1                     |
| -6.8        | <i>Pip5k2b</i>  | phosphatidylinositol-4-phosphate 5-kinase II beta  |
| -4.3        | <i>Xmr</i>      | Xmr protein                                        |
| -3.8        | <i>Rasef</i>    | RAS and EF hand domain containing                  |
| -3.2        | <i>Oog3</i>     | oogenesis 3                                        |
| -3          | <i>Ctnna1</i>   | catenin, alpha 1                                   |
| -2.8        | <i>Trat1</i>    | T cell receptor associated transmembrane 1         |
| -2.8        | <i>Defb11</i>   | defensin beta 11                                   |
| -2.5        | <i>Cryga</i>    | crystallin, gamma A                                |
| -2.4        | <i>Slc45a3</i>  | solute carrier family 45, member 3                 |
| -2.4        | <i>Dleu2</i>    | deleted in lymphocytic leukemia, 2                 |
| -2.4        | <i>Arl14</i>    | ADP-ribosylation factor-like 14                    |
| -2.3        | <i>Ang4</i>     | angiogenin, ribonuclease A family, member 4        |
| -2.3        | <i>Kif23</i>    | kinesin family member 23                           |
| -2.2        | <i>Wnt3a</i>    | wingless-related MMTV integration site 3A          |
| -2.1        | <i>Ctsv</i>     | cathepsin W                                        |
| -2.1        | <i>Abcd2</i>    | ATP-binding cassette, family D, member 2           |
| -2          | <i>Ccnb3</i>    | cyclin B3                                          |
| -1.9        | <i>Jmy</i>      | junction-mediating and regulatory protein          |
| -1.8        | <i>Gsn</i>      | gelsolin                                           |
| -1.8        | <i>Sema3b</i>   | semaphorin 3B                                      |
| -1.6        | <i>Dnase1l3</i> | deoxyribonuclease 1-like 3                         |
| -1.6        | <i>Zpbp</i>     | zona pellucida binding protein                     |
| -1.6        | <i>Tssk6</i>    | testis-specific serine kinase 6                    |
| -1.6        | <i>Xlr4b</i>    | X-linked lymphocyte-regulated 4B                   |
| -1.5        | <i>Myh2</i>     | myosin heavy polypeptide 2                         |
| -1.5        | <i>Klrk1b</i>   | killer cell lectin-like receptor b member 1B       |
| -1.5        | <i>Map2k7</i>   | mitogen activated protein kinase kinase 7          |
| -1.5        | <i>Sema5a</i>   | semaphorin 5A                                      |
| -1.5        | <i>Arhgef16</i> | Rho guanine nucleotide exchange factor16           |
| -1.5        | <i>Arc</i>      | activity regulated cytoskeletal-associated protein |
| -1.5        | <i>Actn1</i>    | actinin, alpha 1                                   |
| -1.5        | <i>App</i>      | amyloid beta (A4) precursor protein                |

The top 35 known genes that were expressed above background level in the control samples and were significantly downregulated in the array.
